# Supplementary material
Source: Springer Nature journal article supplement (https://www.springermedizin.de/resource/supplementary/12879_2005_236_MOESM1_ESM.pdf/9448474)
Supplement: MOESM1 [file 9448474]

Total Subjects Screened  
n = 898

Screen Failures  
n = 64

ITT: All Randomized Subjects  
n = 834

No Study Drug Received  
n = 9  
Tigecycline = 4, IC = 5

mITT: At Least 1 Dose Study Drug  
n = 825  
Tigecycline = 413, IC = 412

Did Not Meet Minimal Disease Criteria  
n = 18  
Tigecycline = 5, IC = 13

c-mITT: Clinical mITT  
n = 807  
Tigecycline = 408, IC = 399

c-mITT: Clinical mITT  
n = 807  
Tigecycline = 408, IC = 399

Did Not Meet Evaluability Criteria  
n = 115  
Tigecycline = 67, IC = 48

No Baseline Isolate  
n = 186  
Tigecycline = 99, IC = 87

CE: Clinically Evaluable  
n = 692  
Tigecycline n = 343, IC = 351

m-mITT: Microbiologic mITT  
n = 621  
Tigecycline = 309, IC = 312

No Baseline and/or Susceptible Isolate  
n = 190  
Tigecycline = 94, IC = 96

ME: Microbiologically Evaluable  
n = 502  
Tigecycline = 247, IC = 255
